# Supplementary material for: A LAPS-Based Differential Sensor for Parallelized Metabolism Monitoring of Various Bacteria
Source: MDPI journal article supplement (doi:10.3390/s19214692), 2019-10-29
Supplement: s1 [file s1]

## Supplementary Materials

**Table 1.** Mean values and standard deviations (three repetitions) of the potential change rates obtained from the slope of the differential signals obtained from Figure 2 and calculated within the first 6 min after adding cells. Cell numbers and / or glucose concentrations were varied. See also Figure 3.

| Glucose (mM) | Cells In 200 $\mu$ L | <i>L. Brevis</i> PCR  (mV/min) |
|--------------|----------------------|--------------------------------|
| -            | $1.2 \times 10^9$    | $1.76 \pm 0.05$                |
| 1.67         | $2.4 \times 10^9$    | $2.60 \pm 0.06$                |
| -            | $4.8 \times 10^9$    | $3.70 \pm 0.02$                |
| -            | $1.2 \times 10^9$    | $2.30 \pm 0.02$                |
| 2.5          | $2.4 \times 10^9$    | $3.30 \pm 0.05$                |
| -            | $4.8 \times 10^9$    | $4.80 \pm 0.04$                |
| -            | $1.2 \times 10^9$    | $3.30 \pm 0.02$                |
| 3.33         | $2.4 \times 10^9$    | $4.90 \pm 0.03$                |
| -            | $4.8 \times 10^9$    | $6.50 \pm 0.04$                |
| -            | $1.2 \times 10^9$    | $4.70 \pm 0.03$                |
| 5            | $2.4 \times 10^9$    | $6.00 \pm 0.04$                |
| -            | $4.8 \times 10^9$    | $7.20 \pm 0.05$                |

**Table 2.** Mean values and standard deviations (three repetitions) of the potential change rate values obtained from the slope of differential signals calculated within the first 6 min after adding cells. The cell number of  $4.8 \times 10^9$  cells was kept constant and the glucose concentrations were varied. N.D.S.C.: No Detectable Signal Changes. See also Figure 4.

| Glucose (mM) | <i>L. Brevis</i> PCR  (mV/min) | <i>C. Glutamicum</i> PCR  (mV/min) | <i>E. Coli</i> PCR  (mV/min) |
|--------------|--------------------------------|------------------------------------|------------------------------|
| 0.042        | N.D.S.C.                       | $0.20 \pm 0.08$                    | $0.13 \pm 0.07$              |
| 0.085        | N.D.S.C.                       | $0.43 \pm 0.06$                    | $0.28 \pm 0.08$              |
| 0.17         | N.D.S.C.                       | $1.00 \pm 0.09$                    | $0.60 \pm 0.12$              |
| 0.20         | N.D.S.C.                       | -                                  | -                            |
| 0.33         | N.D.S.C.                       | $2.00 \pm 0.27$                    | $2.53 \pm 0.14$              |
| 0.40         | N.D.S.C.                       | -                                  | -                            |
| 0.50         | $0.04 \pm 0.01$                | $3.60 \pm 0.40$                    | $3.45 \pm 0.12$              |
| 0.68         | $0.21 \pm 0.04$                | -                                  | -                            |
| 0.83         | $0.56 \pm 0.07$                | $4.20 \pm 0.14$                    | $4.28 \pm 0.12$              |
| 1.20         | $1.60 \pm 0.06$                | -                                  | -                            |
| 1.67         | $3.00 \pm 0.01$                | $4.90 \pm 0.48$                    | $5.48 \pm 0.08$              |
| 2.50         | $4.90 \pm 0.05$                | $5.10 \pm 0.08$                    | $5.82 \pm 0.07$              |
| 3.33         | $6.50 \pm 0.05$                | $5.30 \pm 0.13$                    | $6.12 \pm 0.06$              |
| 5.0          | $7.20 \pm 0.06$                | $5.60 \pm 0.15$                    | $6.40 \pm 0.10$              |

**Table 3.** The mean values and standard deviations (three repetitions) of the potential change rates obtained from the slope of differential signals calculated within the first 6 min after adding cells for *L. brevis*, *C. glutamicum*, and *E. coli*. The glucose concentration of 1.67 mM was kept constant and the cell number was varied from  $0.3 \times 10^9$  up to  $4.8 \times 10^9$  cells. See also Figure 5.

| Glucose (mM) | Cells In 200 $\mu$ L | <i>L. Brevis</i> PCR  (mV/min) | <i>C. Glutamicum</i> PCR  (mV/min) | <i>E. Coli</i> PCR  (mV/min) |
|--------------|----------------------|--------------------------------|------------------------------------|------------------------------|
| -            | $0.3 \times 10^9$    | $0.33 \pm 0.04$                | $0.49 \pm 0.05$                    | $0.84 \pm 0.13$              |
| -            | $0.6 \times 10^9$    | $0.78 \pm 0.03$                | $1.02 \pm 0.10$                    | $1.90 \pm 0.12$              |
| 1.67         | $1.2 \times 10^9$    | $1.76 \pm 0.05$                | $2.10 \pm 0.11$                    | $3.10 \pm 0.11$              |
| -            | $2.4 \times 10^9$    | $2.40 \pm 0.06$                | $3.10 \pm 0.22$                    | $4.50 \pm 0.10$              |
| -            | $4.8 \times 10^9$    | $3.70 \pm 0.02$                | $4.90 \pm 0.04$                    | $5.60 \pm 0.15$              |

**Table 4.** Mean values and standard deviations (three repetitions) of potential change rate values obtained from the slope of the differential signals calculated within the first 6 min after adding cells for *L. brevis*, *C. glutamicum*, and *E. coli*. The glucose concentration of 1.67 mM was kept constant and the cell number was varied from  $0.3 \times 10^9$  up to  $4.8 \times 10^9$  cells. See also Figure 7.

| Glucose (mM) | Cells In 200 $\mu$ L | <i>L. Brevis</i> PCR  (mV/min) | <i>C. Glutamicum</i> PCR  (mV/min) | <i>E. Coli</i> PCR  (mV/min) |
|--------------|----------------------|--------------------------------|------------------------------------|------------------------------|
| -            | $0.3 \times 10^9$    | $0.51 \pm 0.05$                | $0.62 \pm 0.03$                    | $0.85 \pm 0.02$              |
| -            | $0.6 \times 10^9$    | $1.24 \pm 0.06$                | $1.30 \pm 0.04$                    | $2.30 \pm 0.03$              |
| 1.67         | $1.2 \times 10^9$    | $2.20 \pm 0.05$                | $2.60 \pm 0.04$                    | $3.20 \pm 0.03$              |
| -            | $2.4 \times 10^9$    | $2.80 \pm 0.04$                | $3.40 \pm 0.07$                    | $4.70 \pm 0.06$              |
| -            | $4.8 \times 10^9$    | $3.30 \pm 0.05$                | $4.10 \pm 0.06$                    | $5.20 \pm 0.04$              |
